# Supplementary material for: Diffusible GRAPHIC to visualize morphology of cells after specific cell–cell contact
Source: PubMed Central journal article supplement (PMC7468259; doi:10.1038/s41598-020-71474-0), 2020-09-02
Supplement: 41598_2020_71474_MOESM2_ESM.pdf [file 41598_2020_71474_MOESM2_ESM.pdf]

**Diffusible GRAPHIC to visualize morphology of cells after specific cell-cell contact**

Nagatoki Kinoshita, Arthur JY Huang, Thomas J McHugh, Atsushi Miyawaki and Tomomi Shimogori

Supplementary Figures

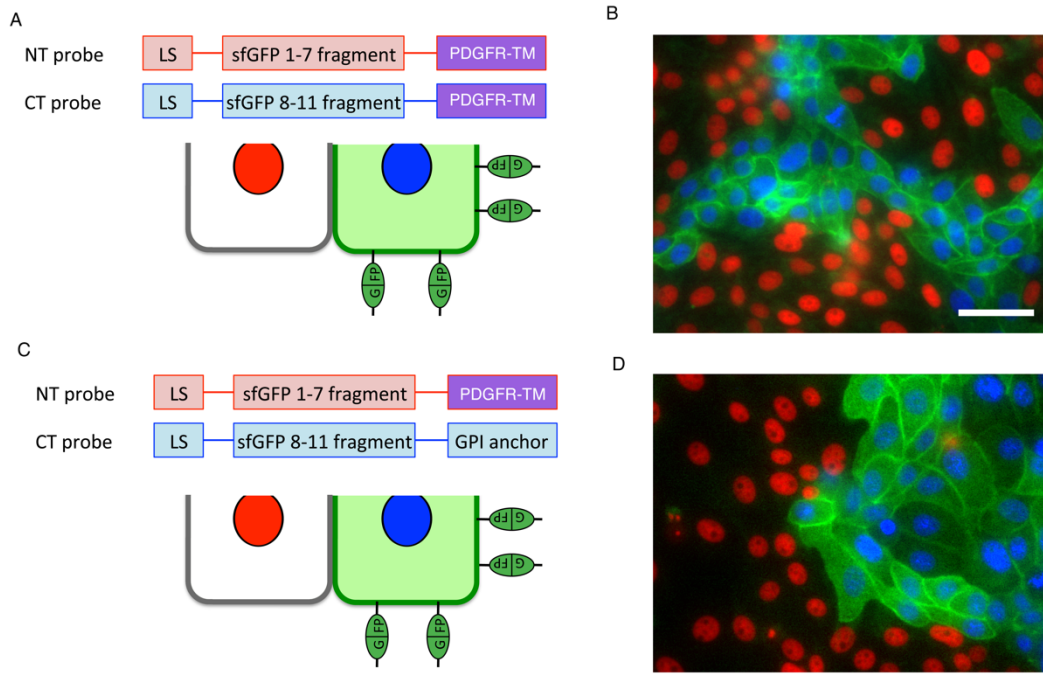

sFig 1 Kinoshita et al.,

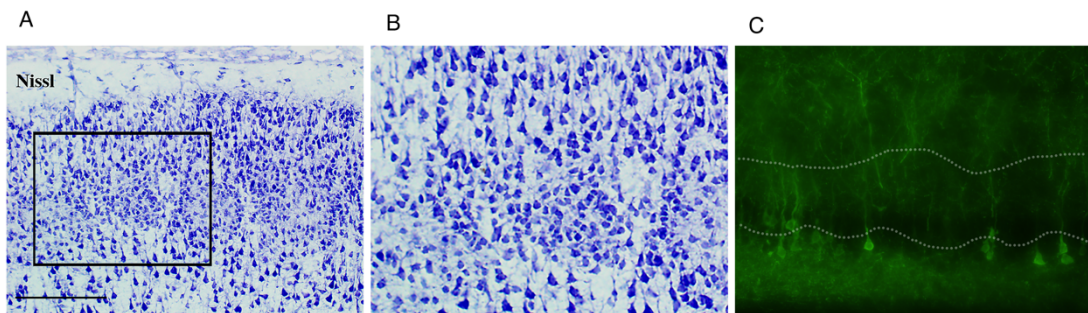

sFig 2

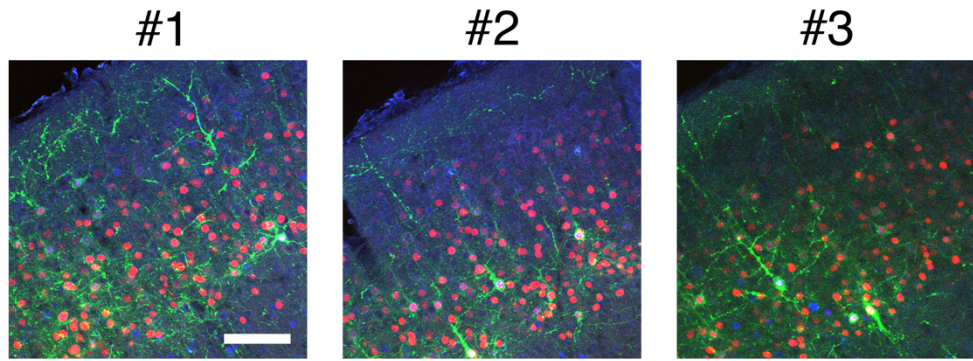

sFig 3 Kinoshita et al.,
